# Supplementary material for: Silencing of proinflammatory NF-κB and inhibition of herpes simplex virus (HSV) replication by ultrasmall gold nanoparticles (2 nm) conjugated with small-interfering RNA
Source: Royal Society of Chemistry journal article supplement (doi:10.1039/d2na00250g), 2022-01-01
Supplement: d2na00250g1.pdf [file d2na00250g1.pdf]

## Supplementary Information

### **Silencing of proinflammatory NFκB and inhibition of herpes simplex virus (HSV) replication by ultrasmall gold nanoparticles (2 nm) conjugated with small-interfering RNA**

Natalie Wolff,<sup>1,#</sup> Sebastian Kollenda,<sup>1,#</sup> Kai Klein,<sup>1</sup> Kateryna Loza,<sup>1</sup> Marc Heggen,<sup>2</sup> Leonie Brochhagen,<sup>3</sup> Oliver Witzke,<sup>3</sup> Adalbert Krawczyk,<sup>3</sup> Ingrid Hilger,<sup>4</sup> and Matthias Eppel<sup>1,\*</sup>

<sup>1</sup> Inorganic Chemistry and Centre for Nanointegration Duisburg-Essen (CENIDE), University of Duisburg-Essen, 45117 Essen, Germany

<sup>2</sup> Ernst-Ruska Centre for Microscopy and Spectroscopy with Electrons, Forschungszentrum Jülich GmbH, 52428 Jülich, Germany

<sup>3</sup> Department of Infectious Diseases, West German Centre of Infectious Diseases, University Hospital Essen, University of Duisburg-Essen, Hufelandstr. 55, 45147 Essen, Germany

<sup>4</sup> Dept. of Experimental Radiology, Institute of Diagnostic and Interventional Radiology, Jena University Hospital, Friedrich Schiller University Jena, Am Klinikum 1, 07740 Jena, Germany

# Both authors share first authorship

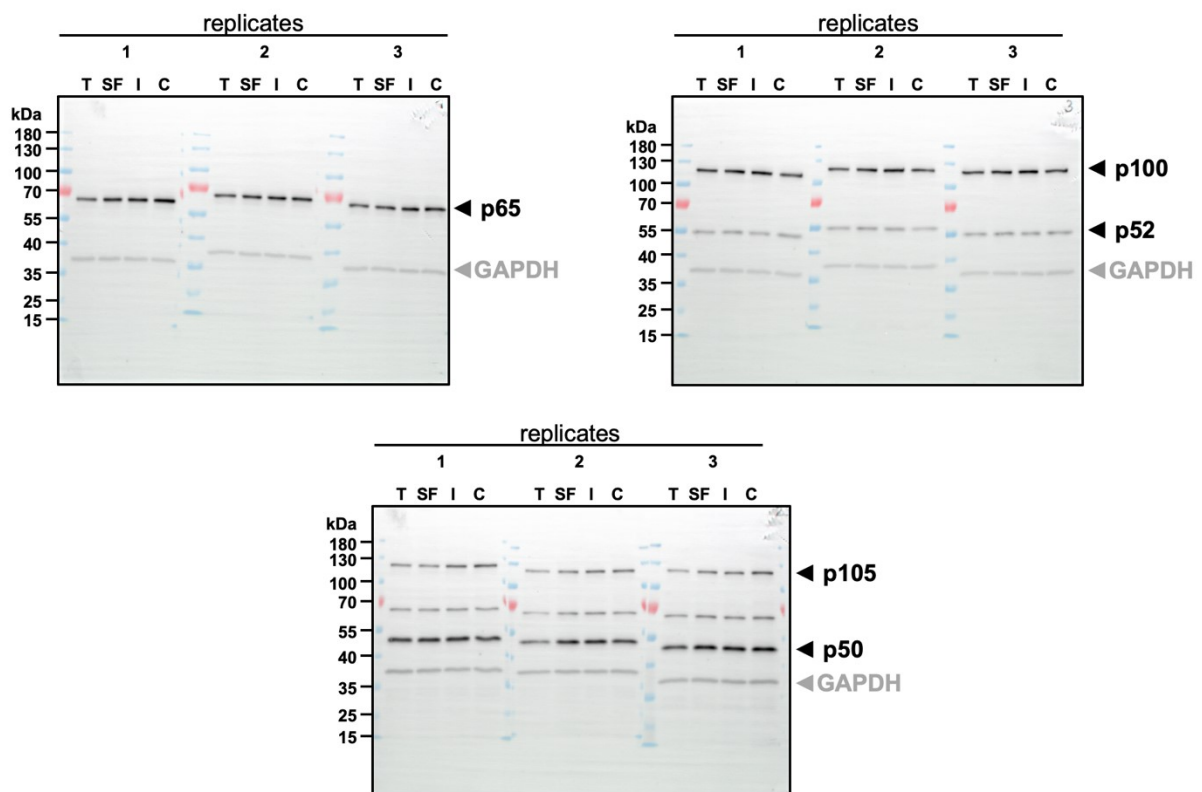

**Supplementary Figure 1.** Images of protein bands from inflamed murine macrophages after exposure with Au-siRNA-p65-NPs. Proteins were separated via SDS-PAGE and visualized via Western and immunoblotting. T: Inflamed cells treated with anti-p65 NK-kB Au-siRNA-p65 nanoparticles ( $1 \mu\text{g siRNA mL}^{-1}$ , 72 h), S: Inflamed cells treated with Lipofectamine/siRNA-p65 ( $1 \mu\text{g siRNA mL}^{-1}$ , 72 h), I: Non-treated inflamed cells, C: Non-treated, non-inflamed cells. Each protein band was assessed in triplicate ( $N = 3$ ).
